# Supplementary material for: Substitutions in SARS-CoV-2 Mpro Selected by Protease Inhibitor Boceprevir Confer Resistance to Nirmatrelvir
Source: MDPI journal article supplement (doi:10.3390/v15091970), 2023-09-21
Supplement: s1 [file s1]

**Supplementary Table S1.** Non-synonymous mutations in boceprevir escape viruses localizing to sequences encoding Mpro.

| Nucleotide change <sup>a</sup> | Amino acid change <sup>a</sup> | SARS-CoV-2 protein <sup>h</sup> | Escape 1 <sup>a</sup> - % <sup>b</sup> |                         |                         | Escape 2 <sup>c</sup> - % <sup>b</sup> |                         | Escape 3 <sup>d</sup> - % <sup>b</sup> | Escape 4 <sup>e</sup> - % <sup>b</sup> |                         | Escape 5 <sup>f</sup> - % <sup>b</sup> |
|--------------------------------|--------------------------------|---------------------------------|----------------------------------------|-------------------------|-------------------------|----------------------------------------|-------------------------|----------------------------------------|----------------------------------------|-------------------------|----------------------------------------|
|                                |                                |                                 | 5xEC50 D16 <sup>i</sup>                | 5xEC50 D57 <sup>i</sup> | 5xEC50 D74 <sup>i</sup> | 5xEC50 D24 <sup>i</sup>                | 7xEC50 D57 <sup>i</sup> | 7xEC50 D124 <sup>i</sup>               | 7xEC50 D24 <sup>i</sup>                | 7xEC50 D57 <sup>i</sup> | 7xEC50 P3D5 <sup>i</sup>               |
| C10116T                        | T21I                           | Mpro                            | -                                      | -                       | -                       | 16                                     | -                       | 92                                     | -                                      | -                       | 16                                     |
| C10202T                        | L50F                           | Mpro                            | -                                      | 100                     | 100                     | 81                                     | 100                     | 100                                    | -                                      | 100                     | -                                      |
| G10533T                        | C160F                          | Mpro                            | -                                      | -                       | 48                      | -                                      | -                       | -                                      | -                                      | -                       | -                                      |
| C10572T                        | A173V                          | Mpro                            | -                                      | 98                      | 100                     | 81                                     | 100                     | 100                                    | 98                                     | 100                     | 78                                     |
| C10626T                        | A191V                          | Mpro                            | -                                      | -                       | 20                      | -                                      | -                       | -                                      | -                                      | 100                     | 14                                     |
| A10842G                        | D263G                          | Mpro                            | -                                      | -                       | -                       | -                                      | -                       | -                                      | -                                      | -                       | 48                                     |

<sup>a</sup> Escape 1, source of polyclonal escape virus BOC-EV1: Continuous virus culture in VeroE6 cells for 74 days under treatment with boceprevir. Treatment concentration was increased when virus had spread under a given concentration. At the timepoint when NGS was carried out the virus had spread to  $\geq 70\%$  of culture cells. The culture was treated with 5xEC50 boceprevir from day 3 to 24 post infection, with 5xEC50 from day 28 to 36, with 4xEC50 from day 37 to 42 and with 5xEC50 from day 43 to 74. In the given time intervals, treatment was carried out every 2-3 days.

<sup>b</sup> Frequency (%) of non-synonymous nucleotide changes in the viral genome sequences encoding Mpro recorded by NGS. Analyzed viruses were harvested from cell culture supernatant. Changes that occurred with at least 10% frequency in at least one of the analyzed virus populations were included in this table. -, frequency of the given change was  $<10\%$ .

<sup>c</sup> Escape 2, source of polyclonal escape virus BOC-EV2: Continuous virus culture in VeroE6 cells for 57 days under treatment with boceprevir. Treatment concentration was increased when virus had spread under a given concentration. At the timepoint when NGS was carried out the virus had spread to  $\geq 70\%$  of culture cells. The culture was treated with 5xEC50 boceprevir from day 2 to 53 post infection and with 7xEC50 from day 54 to 66. In the given time intervals, treatment was carried out every 2-3 days.

<sup>d</sup> Escape 3: Continuous virus culture in VeroE6 cells for 124 days under treatment with boceprevir. Treatment concentration was increased when virus had spread under a given concentration. At the timepoint when NGS was carried out the virus had spread to  $\geq 70\%$  of culture cells. The culture was treated directly after infection with 2.5xEC50 boceprevir for 21 days, with 3xEC50 from day 22 to 27, with 4xEC50 from day 28 to 33, with 5xEC50 from day 34 to 100 and with 7xEC50 from day 101 to 124. In the given time intervals, treatment was carried out every 2-3 days.

<sup>e</sup> Escape 4: Continuous virus culture in VeroE6 cells for 57 days under treatment with boceprevir. Treatment concentration was increased when virus had spread under a given concentration. At the timepoint when NGS was carried out the virus had spread to  $\geq 40\%$  of culture cells. The culture was treated with 7xEC50 boceprevir from day 2 to 57 post infection. In the given time interval, treatment was carried out every 2-3 days.

<sup>f</sup> Escape 5: Primary escape culture followed by 3 viral passages in VeroE6 cells under treatment with boceprevir. Treatment concentration was increased when virus had spread under a given concentration. At the timepoint when NGS was carried out the virus had spread to  $\geq 90\%$  of culture cells. All cultures were treated directly after infection and then every 2-3 days. The primary escape culture was treated with 2.5xEC50 boceprevir for 21 days, with 3xEC50 from day 22 to 27 and with 4xEC50 from day 28 to 34. The 1<sup>st</sup> passage (P1) culture was treated with 5xEC50 for 3 days. The 2<sup>nd</sup> passage (P2) culture was treated with 7xEC50 for 3 days. The 3<sup>rd</sup> passage (P3) culture was treated with 7xEC50 for 5 days.

<sup>g</sup> Nucleotide / amino acid position numbers and original nucleotides / amino acids, given in front of the position numbers, relate to the nucleotide / amino acid sequence of the SARS-CoV-2/human/Denmark/DK-AHH1/2020 strain (GenBank accession number MZ049597). The changed nucleotides / amino acids, acquired during continuous virus culture or passage under boceprevir treatment, are given after the position numbers.

<sup>h</sup> SARS-CoV-2 protein, to which the identified amino acid changes located relating to the SARS-CoV-2/human/Denmark/DK-AHH1/2020 strain (GenBank accession number MZ049597).

<sup>i</sup> Specification of conditions under which viral genomes subjected to NGS were sampled. Fold EC50 applied and passage (P) and/or day (D) post infection at sampling time.

**Supplementary Table S2.** Potency of boceprevir and nirmatrelvir against original SARS-CoV-2 and SARS-CoV-2 mutants.

| <b>Boceprevir</b><br><b>VeroE6</b>        | <b>EC50</b><br><b>(<math>\mu</math>M)<sup>a</sup></b> | <b>Fold<sup>b</sup></b> | <b>P-value<sup>c</sup></b> | <b>Exp<sup>d</sup></b> |
|-------------------------------------------|-------------------------------------------------------|-------------------------|----------------------------|------------------------|
| <b>Virus</b>                              |                                                       |                         |                            |                        |
| original virus                            | 70                                                    | -                       | -                          | 3                      |
| BOV-EV1                                   | 327                                                   | 4.7                     | < 0.0001                   | 1                      |
| BOC-EV2                                   | 236                                                   | 3.4                     | < 0.0001                   | 1                      |
| L50F                                      | 99                                                    | 1.4                     | < 0.0001                   | 2                      |
| C160F                                     | 107                                                   | 1.5                     | < 0.0001                   | 1                      |
| A173V                                     | 98                                                    | 1.4                     | < 0.0001                   | 2                      |
| A191V                                     | 90                                                    | 1.3                     | < 0.0001                   | 1                      |
| L50F+A173V                                | 125                                                   | 1.8                     | < 0.0001                   | 3                      |
| L50F+C160F+A173V                          | 111                                                   | 1.6                     | < 0.0001                   | 1                      |
| L50F+A173V+A191V                          | 133                                                   | 1.9                     | < 0.0001                   | 1                      |
| <b>Boceprevir</b><br><b>A549-hACE-2</b>   | <b>EC50</b><br><b>(<math>\mu</math>M)<sup>a</sup></b> | <b>Fold<sup>b</sup></b> | <b>P-value<sup>c</sup></b> | <b>Exp<sup>d</sup></b> |
| <b>Virus</b>                              |                                                       |                         |                            |                        |
| original virus                            | 24                                                    | -                       | -                          | 3                      |
| BOV-EV1                                   | 67                                                    | 2.8                     | < 0.0001                   | 3                      |
| BOC-EV2                                   | 94                                                    | 3.9                     | < 0.0001                   | 3                      |
| L50F                                      | 48                                                    | 2.0                     | < 0.0001                   | 1                      |
| A173V                                     | 11                                                    | 0.5                     | 0.4405                     | 1                      |
| L50F+A173V                                | 62                                                    | 2.6                     | < 0.0001                   | 1                      |
| <b>Nirmatrelvir</b><br><b>VeroE6</b>      | <b>EC50</b><br><b>(<math>\mu</math>M)<sup>a</sup></b> | <b>Fold<sup>b</sup></b> | <b>P-value<sup>c</sup></b> | <b>Exp<sup>d</sup></b> |
| <b>Virus</b>                              |                                                       |                         |                            |                        |
| original virus                            | 4.0                                                   | -                       | -                          | 13                     |
| BOV-EV1                                   | 30                                                    | 7.3                     | < 0.0001                   | 1                      |
| BOC-EV2                                   | 25                                                    | 6.2                     | < 0.0001                   | 1                      |
| L50F                                      | 9.3                                                   | 2.3                     | < 0.0001                   | 1                      |
| C160F                                     | 8.6                                                   | 2.1                     | < 0.0001                   | 1                      |
| A173V                                     | 7.4                                                   | 1.8                     | < 0.0001                   | 1                      |
| A191V                                     | 5.5                                                   | 1.4                     | < 0.0001                   | 1                      |
| L50F+A173V                                | 14                                                    | 3.5                     | < 0.0001                   | 2                      |
| L50F+C160F+A173V                          | 11                                                    | 2.8                     | < 0.0001                   | 2                      |
| L50F+A173V+A191V                          | 12                                                    | 3.0                     | < 0.0001                   | 2                      |
| <b>Nirmatrelvir</b><br><b>A549-hACE-2</b> | <b>EC50</b><br><b>(<math>\mu</math>M)<sup>a</sup></b> | <b>Fold<sup>b</sup></b> | <b>P-value<sup>c</sup></b> | <b>Exp<sup>d</sup></b> |
| <b>Virus</b>                              |                                                       |                         |                            |                        |
| original virus                            | 0.08                                                  | -                       | -                          | 7                      |
| BOV-EV1                                   | 0.5                                                   | 6.1                     | < 0.0001                   | 3                      |
| BOC-EV2                                   | 0.6                                                   | 6.6                     | < 0.0001                   | 3                      |
| L50F                                      | 0.1                                                   | 1.2                     | 0.0983                     | 2                      |
| A173V                                     | 0.2                                                   | 2.3                     | 0.0001                     | 1                      |
| L50F+A173V                                | 0.2                                                   | 2.1                     | < 0.0001                   | 3                      |

<sup>a</sup> EC50, half maximal effective concentration of the specified inhibitor against the specific virus.

<sup>b</sup> Fold resistance values were calculated as EC50<sub>Escape Virus</sub>/EC50<sub>Original</sub>

<sup>c</sup> P-values.

<sup>d</sup> Number of replicate experiments. Curves derived from representative experiments are shown in Figure 1, 3 and 6.

**Supplementary Table S3.** Non-synonymous mutations in serially passaged SARS-CoV-2 mutants in the complete open reading frame (ORF).

| <b>Nucleotide<br/>change<sup>b</sup></b> | <b>Amino acid<br/>change<sup>b</sup></b> | <b>SARS-CoV-2<br/>protein<sup>c</sup></b> | <b>SARS-CoV-2 mutants-%<sup>a</sup></b> |                                   |                                        |
|------------------------------------------|------------------------------------------|-------------------------------------------|-----------------------------------------|-----------------------------------|----------------------------------------|
|                                          |                                          |                                           | <b>L50F<br/>P4D2<sup>d</sup></b>        | <b>A173V<br/>P4D2<sup>d</sup></b> | <b>L50F+A173V<br/>P4D2<sup>d</sup></b> |
| C10202T                                  | L50F                                     | Mpro                                      | 100                                     | -                                 | 100                                    |
| C10572T                                  | A173V                                    | Mpro                                      | -                                       | 89                                | 100                                    |
| C11379T                                  | A136V                                    | nsp6                                      | -                                       | 90                                | -                                      |
| C19325T                                  | P429L                                    | nsp14                                     | -                                       | 12                                | -                                      |
| A22296G                                  | H245R                                    | S                                         | 28                                      | -                                 | -                                      |
| C23525T                                  | H655Y                                    | S                                         | 11                                      | -                                 | -                                      |
| G23607A                                  | R682Q                                    | S                                         | -                                       | -                                 | 87                                     |
| C26309A                                  | A22D                                     | E                                         | -                                       | 30                                | -                                      |

<sup>a</sup> Frequency (%) of non-synonymous nucleotide changes in the complete ORF of the specified SARS-CoV-2 mutants following 4 viral passages in cell culture, as recorded by NGS. Analyzed viruses were harvested from cell culture supernatant. Changes that occurred with at least 10% frequency in at least one of the analyzed virus populations were included in this table. -, frequency of the given change was <10%.

<sup>b</sup> Nucleotide / amino acid position numbers and original nucleotides / amino acids, given in front of the position numbers, relate to the nucleotide / amino acid sequence of the SARS-CoV-2/human/Denmark/DK-AHH1/2020 strain (GenBank accession number MZ049597). The changed nucleotides / amino acids, acquired following serial passage, are given after the position numbers.

<sup>c</sup> SARS-CoV-2 protein, to which the identified amino acid changes located relating to the SARS-CoV-2/human/Denmark/DK-AHH1/2020 strain (GenBank accession number MZ049597).

<sup>d</sup> Specification of the SARS-CoV-2 mutant and the time when viral genomes subjected to NGS were sampled, being passage 4 (P4) day 2 (D2) post infection for all mutants.

**Supplementary Table S4.** Naturally occurring substitutions in SARS-CoV-2 Mpro.

|                                                                                  | Amino acid<br>residue <sup>b</sup> | SARS-CoV-2 Mpro residue <sup>a</sup> |      |      |       |
|----------------------------------------------------------------------------------|------------------------------------|--------------------------------------|------|------|-------|
|                                                                                  |                                    | L50                                  | C160 | A173 | A191  |
| <b>Number of<br/>viruses<sup>c</sup><br/>(Total:<br/>10,302,924<br/>viruses)</b> | A                                  | 3                                    | 1    | 0    | 0     |
|                                                                                  | R                                  | 20                                   | 2    | 79   | 13    |
|                                                                                  | N                                  | 0                                    | 9    | 66   | 8     |
|                                                                                  | D                                  | 27                                   | 63   | 77   | 1248  |
|                                                                                  | C                                  | 1                                    | 0    | 3    | 5     |
|                                                                                  | Q                                  | 0                                    | 0    | 3    | 11    |
|                                                                                  | E                                  | 0                                    | 1    | 1    | 7     |
|                                                                                  | G                                  | 2                                    | 3    | 3    | 79    |
|                                                                                  | H                                  | 13                                   | 0    | 0    | 11    |
|                                                                                  | I                                  | 38                                   | 5    | 2    | 5     |
|                                                                                  | L                                  | 0                                    | 116  | 13   | 29    |
|                                                                                  | K                                  | 11                                   | 2    | 2    | 48    |
|                                                                                  | M                                  | 1                                    | 2    | 1    | 8     |
|                                                                                  | F                                  | 4370                                 | 3306 | 2    | 10    |
|                                                                                  | P                                  | 11                                   | 1    | 7    | 10    |
|                                                                                  | S                                  | 97                                   | 35   | 82   | 582   |
|                                                                                  | T                                  | 2                                    | 3    | 122  | 655   |
|                                                                                  | W                                  | 0                                    | 4    | 4    | 51    |
|                                                                                  | Y                                  | 0                                    | 563  | 1    | 2     |
|                                                                                  | V                                  | 39                                   | 18   | 181  | 9043  |
|                                                                                  | del                                | 26                                   | 63   | 62   | 1246  |
| <b>Number of<br/>substitutions<sup>d</sup></b>                                   |                                    | 4650                                 | 4195 | 709  | 13023 |

<sup>a</sup> SARS-CoV-2 Mpro residues of interest due to identification of RAS in this study.

<sup>b</sup> Amino acid residues using one letter codes; del, deletion.

<sup>c</sup> For this analysis, a total of 10,302,924 SARS-CoV-2 sequences were retrieved from the GISAID database on April 18th, 2022, prior to widespread use of nirmatrelvir in patients.

<sup>d</sup> Total number of sequences with any substitution at L50, C160, A173 or A191 in Mpro.
